# Supplementary material for: Flexible network reconstruction from relational databases with Cytoscape and CytoSQL
Source: Springer Nature journal article supplement (doi:10.1186/1471-2105-11-360), 2010-07-01

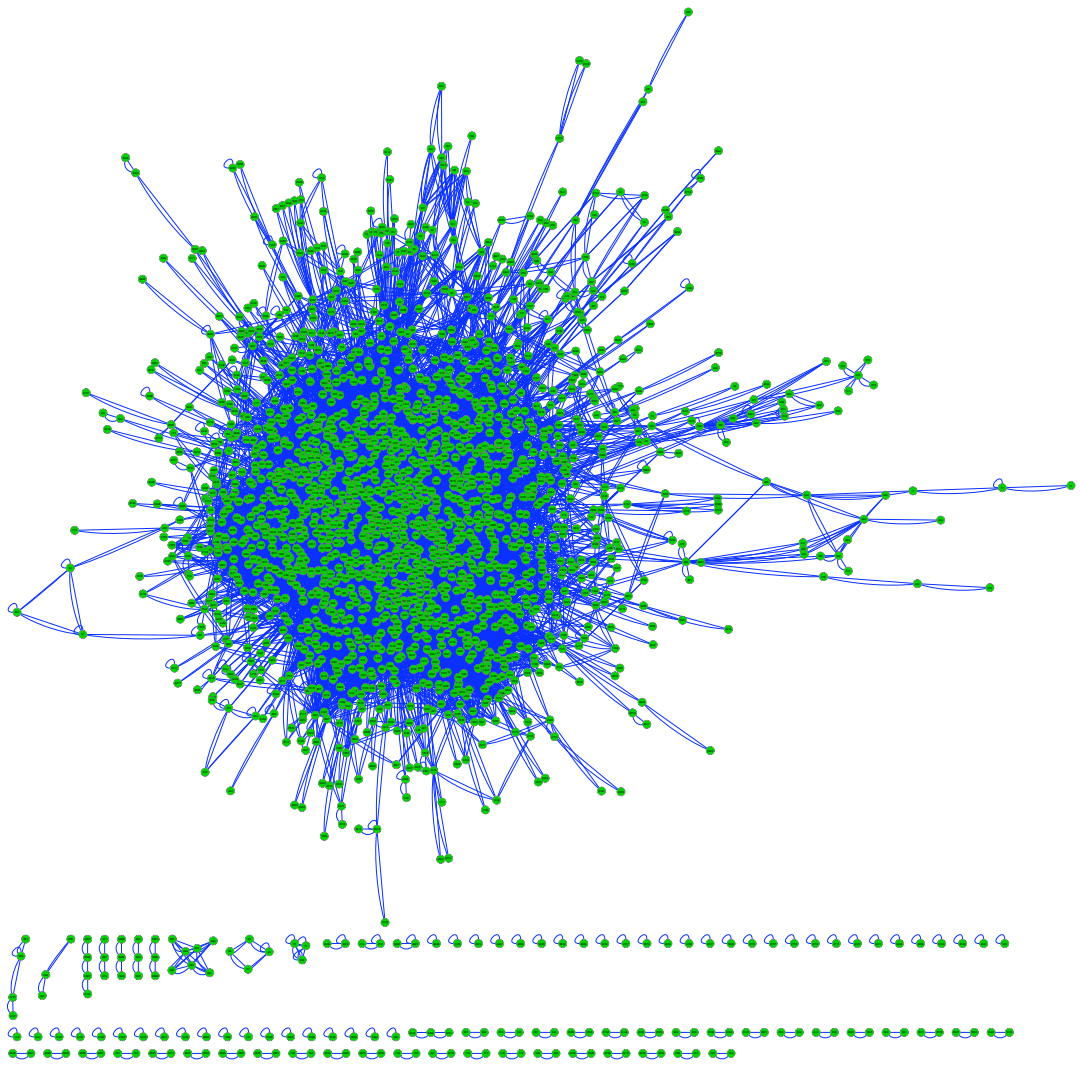

Supplement: 12859_2009_3817_MOESM6_ESM.pdf [file 12859_2009_3817_MOESM6_ESM.pdf]
